# Supplementary material for: Sand mining far outpaces natural supply in a large alluvial river
Source: Copernicus journal article supplement (doi:10.5194/esurf-2021-39), 2021-05-05
Supplement: Supplementary file 1 [file esurf-2021-39-supplement.pdf]

1 **Supplementary Information**

2 **Sand mining far outpaces natural supply in a large alluvial river**

3

4 Christopher R. Hackney, School of Geography, Politics and Sociology, Newcastle University, Newcastle upon  
5 Tyne, UK, NE1 7RU\*

6 Grigorios Vasilopoulos, Energy and Environment Institute, University of Hull, Hull, UK, HU6 7RX

7 Sokchhay Heng, Institute of Technology of Cambodia, Phnom Penh, Cambodia

8 Vasudha Darbari, Energy and Environment Institute, University of Hull, Hull, UK, HU6 7RX

9 Samuel Walker, Energy and Environment Institute, University of Hull, Hull, UK, HU6 7RX

10 Daniel R. Parsons, Energy and Environment Institute, University of Hull, Hull, UK, HU6 7RX

11 \*corresponding author's email address: [christopher.hackney@ncl.ac.uk](mailto:christopher.hackney@ncl.ac.uk)

12

13

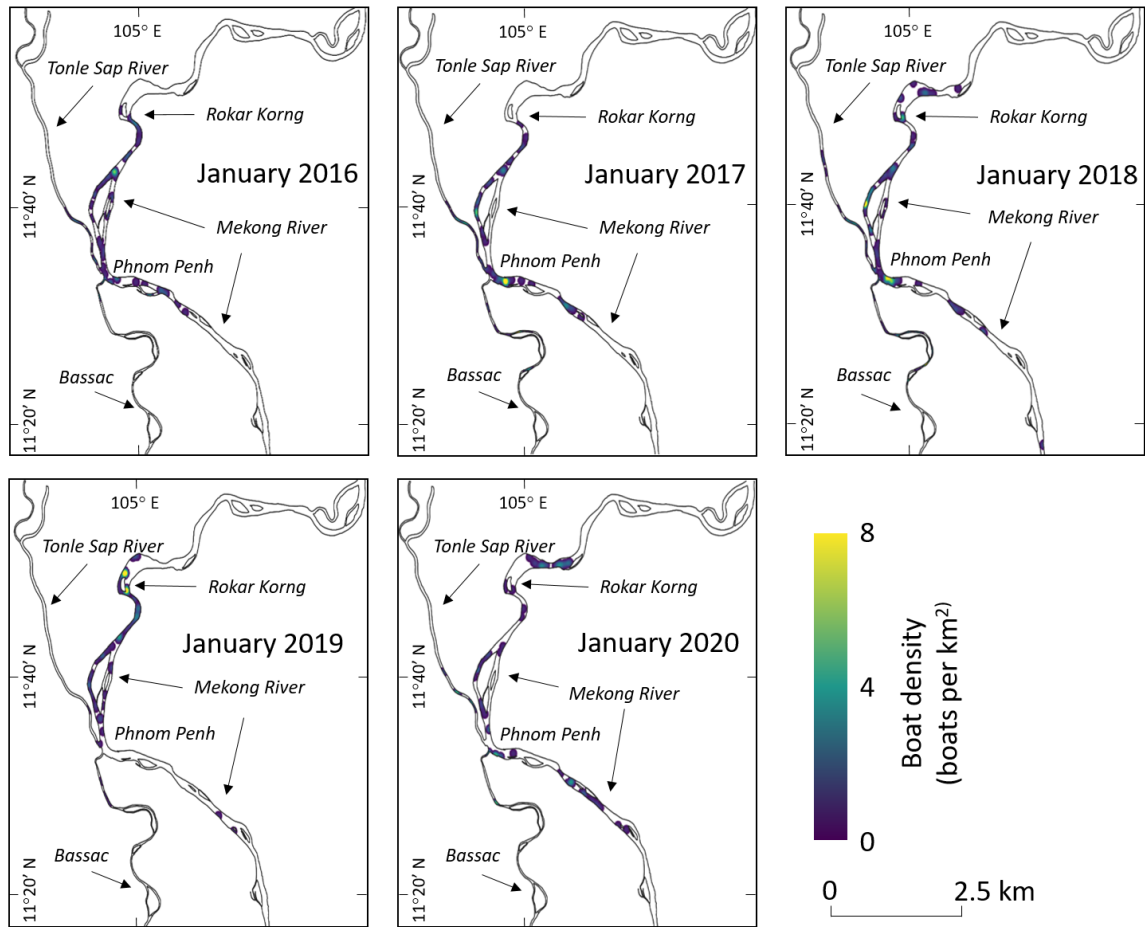

14

15 SI Figure 1: Annual heat maps for January for the period 2016 - 2020 of the Mekong River around Phnom Penh  
 16 showing the locations of mining activity and the density of boats (boats per km<sup>2</sup>) showing changes in the spatial  
 17 distribution of mining activity over the five year period.

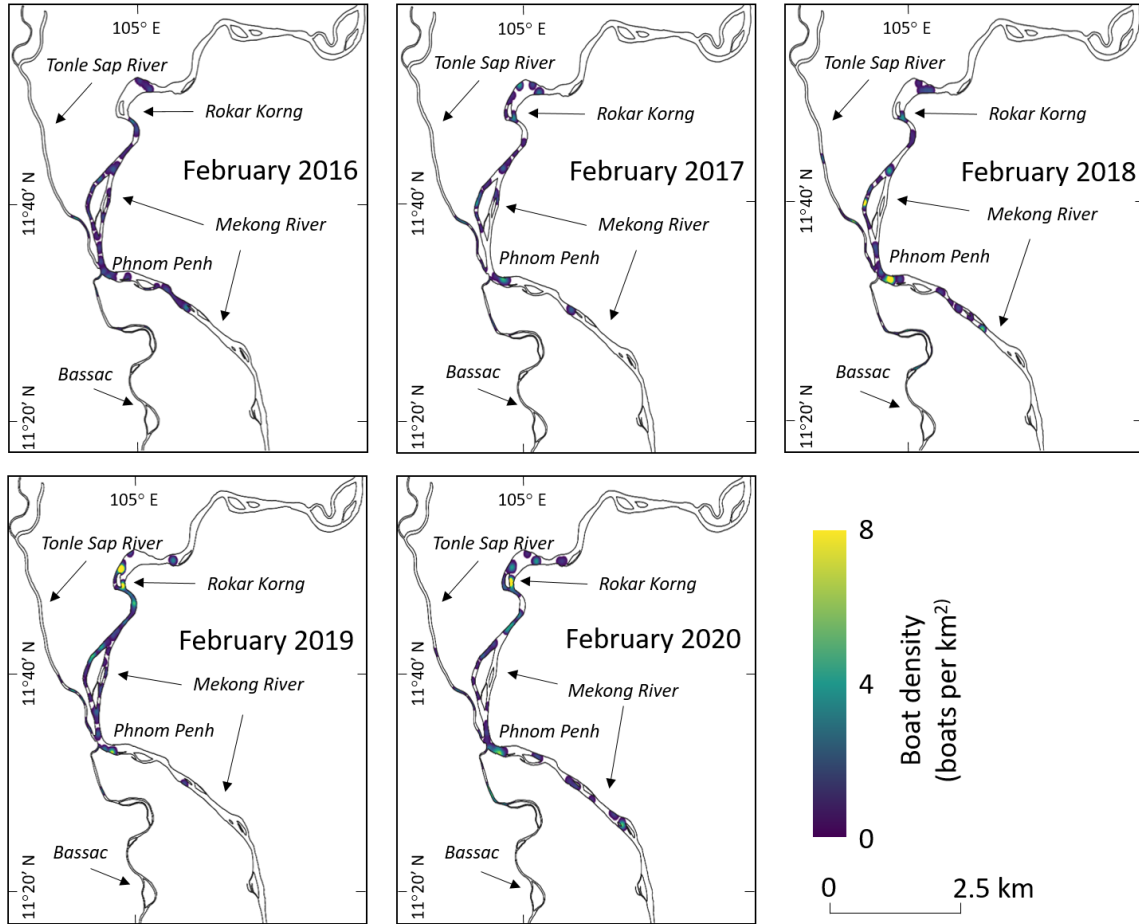

18

19 **SI Figure 2: Annual heat maps for February for the period 2016 - 2020 of the Mekong River around Phnom Penh**  
 20 **showing the locations of mining activity and the density of boats (boats per km<sup>2</sup>) showing changes in the spatial**  
 21 **distribution of mining activity over the five year period.**

22

23

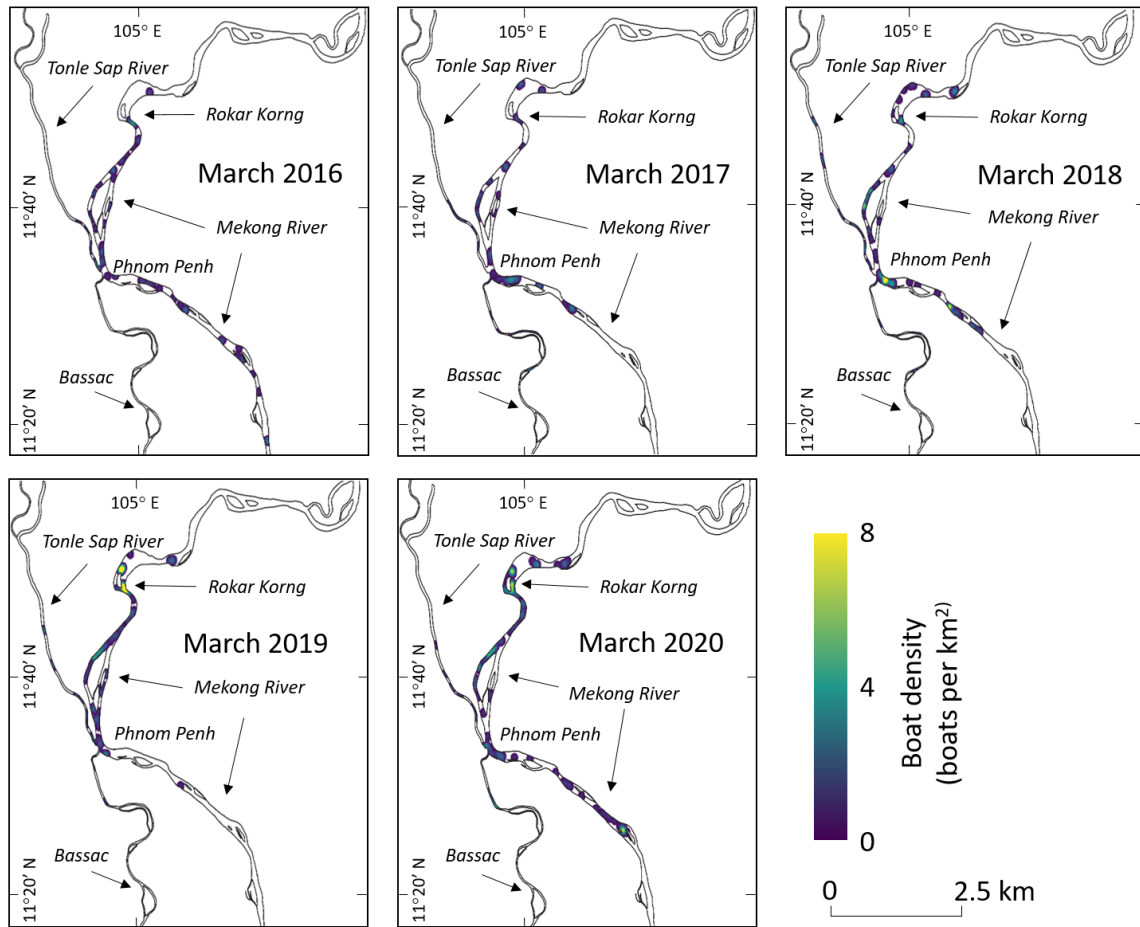

24

25 **SI Figure 3: Annual heat maps for March for the period 2016 - 2020 of the Mekong River around Phnom Penh**  
 26 **showing the locations of mining activity and the density of boats (boats per km<sup>2</sup>) showing changes in the spatial**  
 27 **distribution of mining activity over the five year period.**

28

29

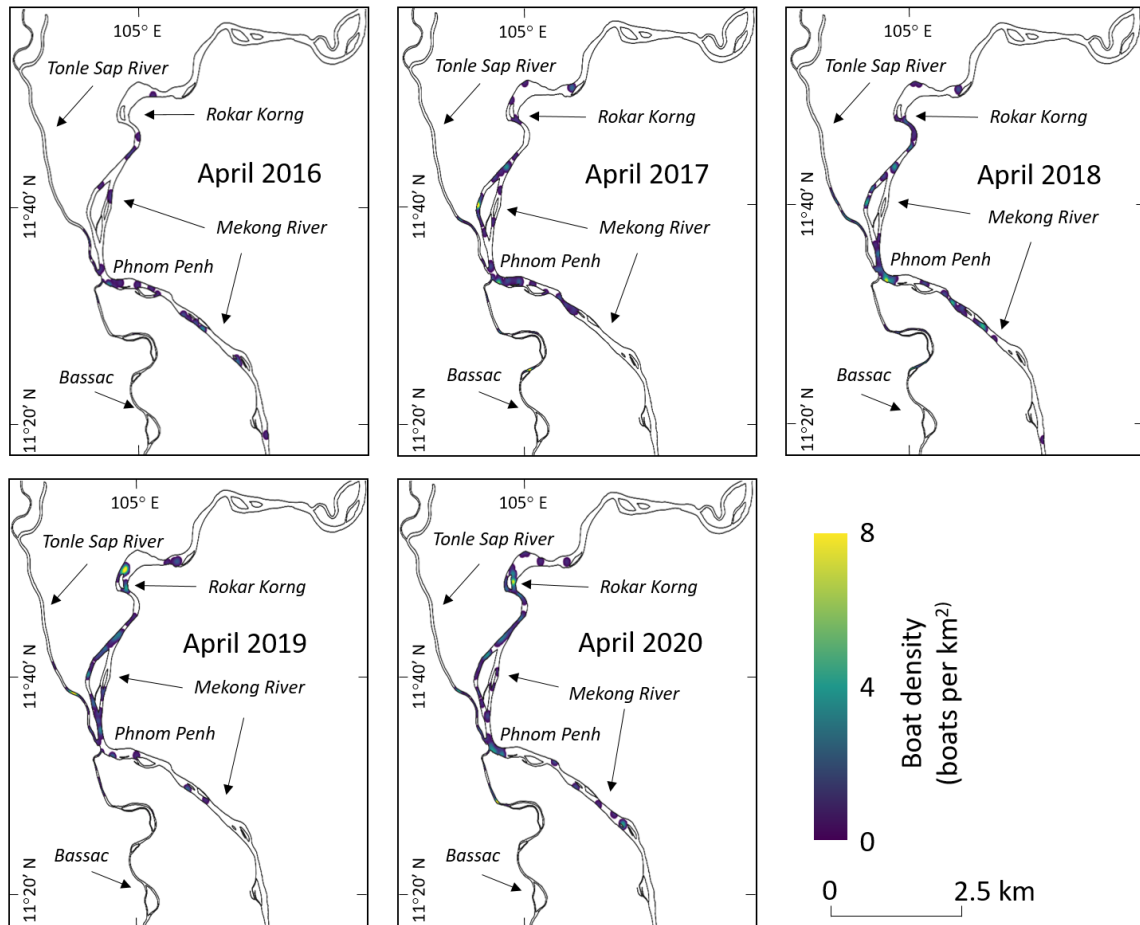

30

31 SI Figure 4: Annual heat maps for April for the period 2016 - 2020 of the Mekong River around Phnom Penh  
 32 showing the locations of mining activity and the density of boats (boats per km<sup>2</sup>) showing changes in the spatial  
 33 distribution of mining activity over the five year period.

34

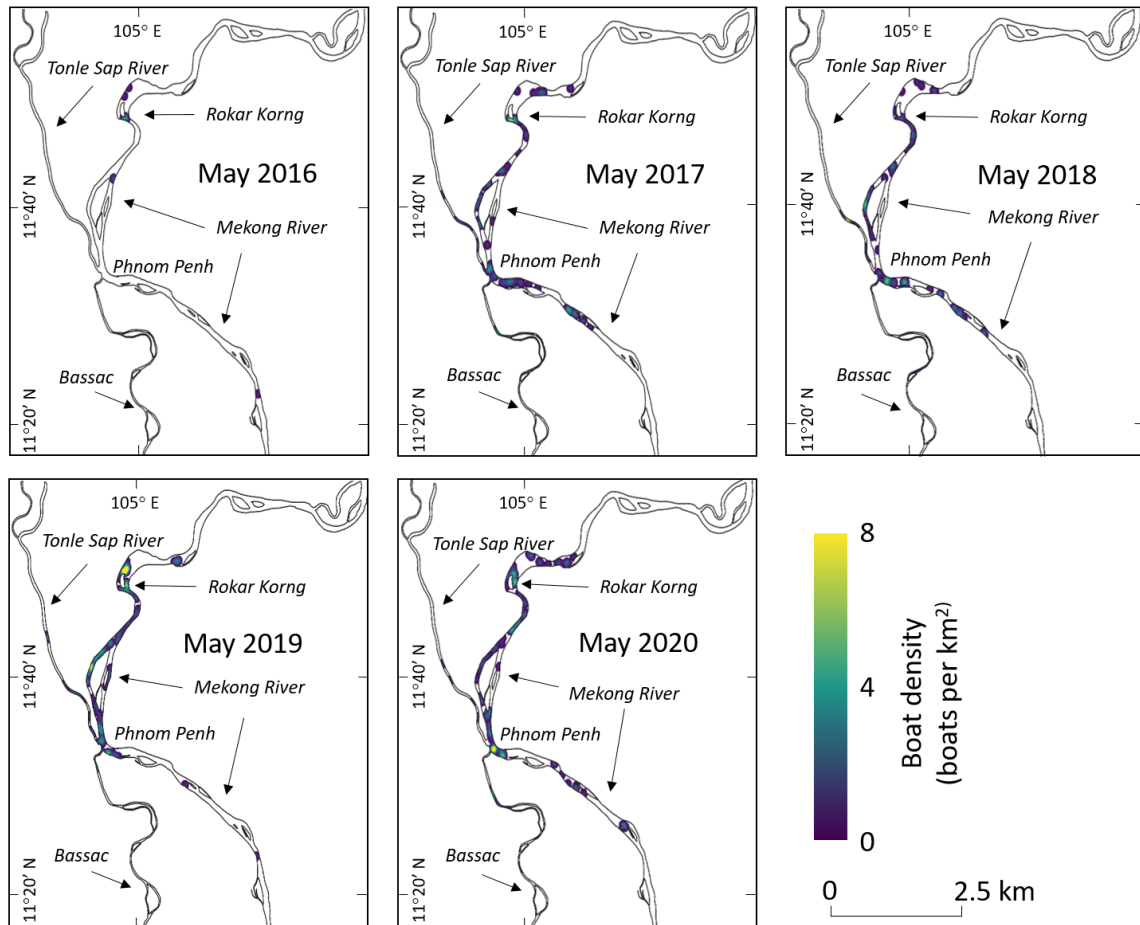

35

36 **SI Figure 5: Annual heat maps for May for the period 2016 - 2020 of the Mekong River around Phnom Penh showing**  
 37 **the locations of mining activity and the density of boats (boats per km<sup>2</sup>) showing changes in the spatial distribution of**  
 38 **mining activity over the five year period.**

39

40

41

42

43

44

45

46

47

48

49

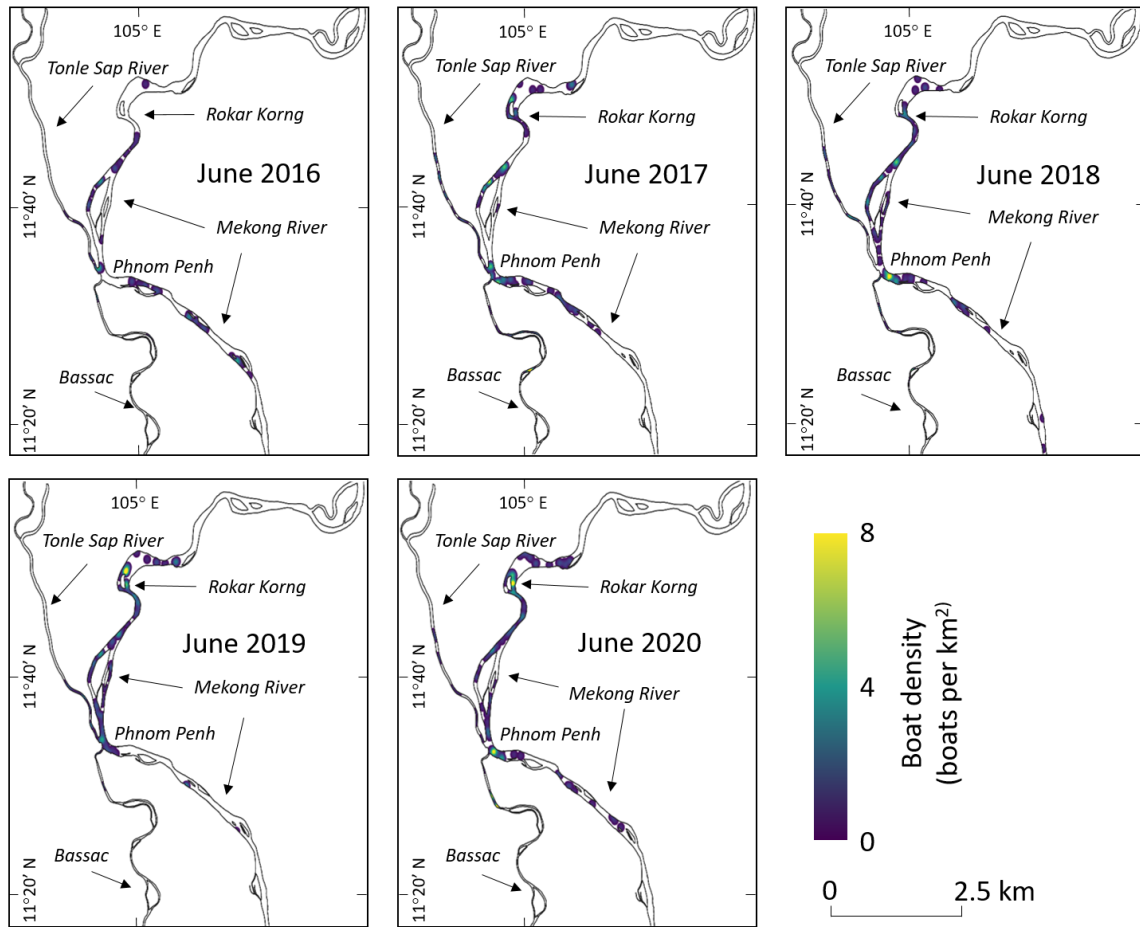

50

51 **SI Figure 6: Annual heat maps for June for the period 2016 - 2020 of the Mekong River around Phnom Penh showing**  
 52 **the locations of mining activity and the density of boats (boats per km<sup>2</sup>) showing changes in the spatial distribution of**  
 53 **mining activity over the five year period.**

54

55

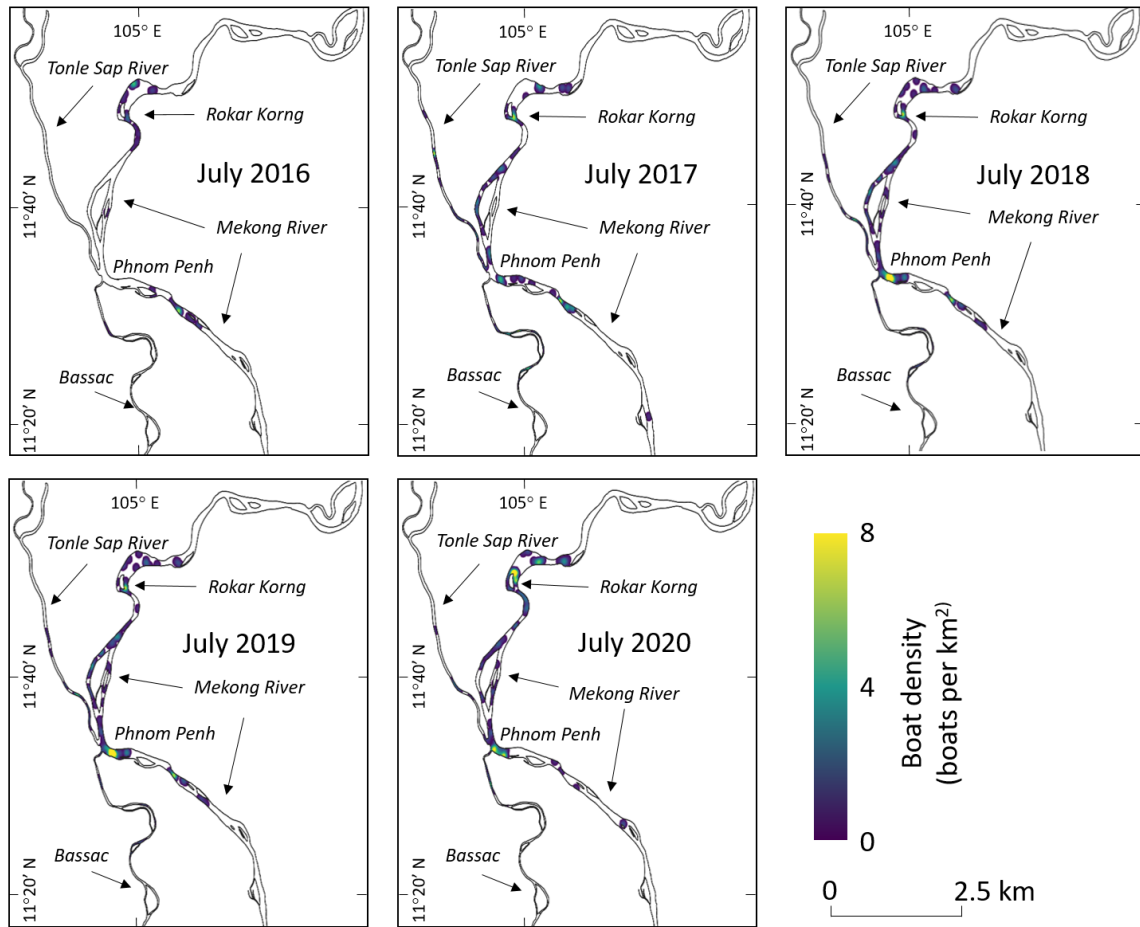

56

57 **SI Figure 7: Annual heat maps for July for the period 2016 - 2020 of the Mekong River around Phnom Penh showing**  
 58 **the locations of mining activity and the density of boats (boats per km<sup>2</sup>) showing changes in the spatial distribution of**  
 59 **mining activity over the five year period.**

60



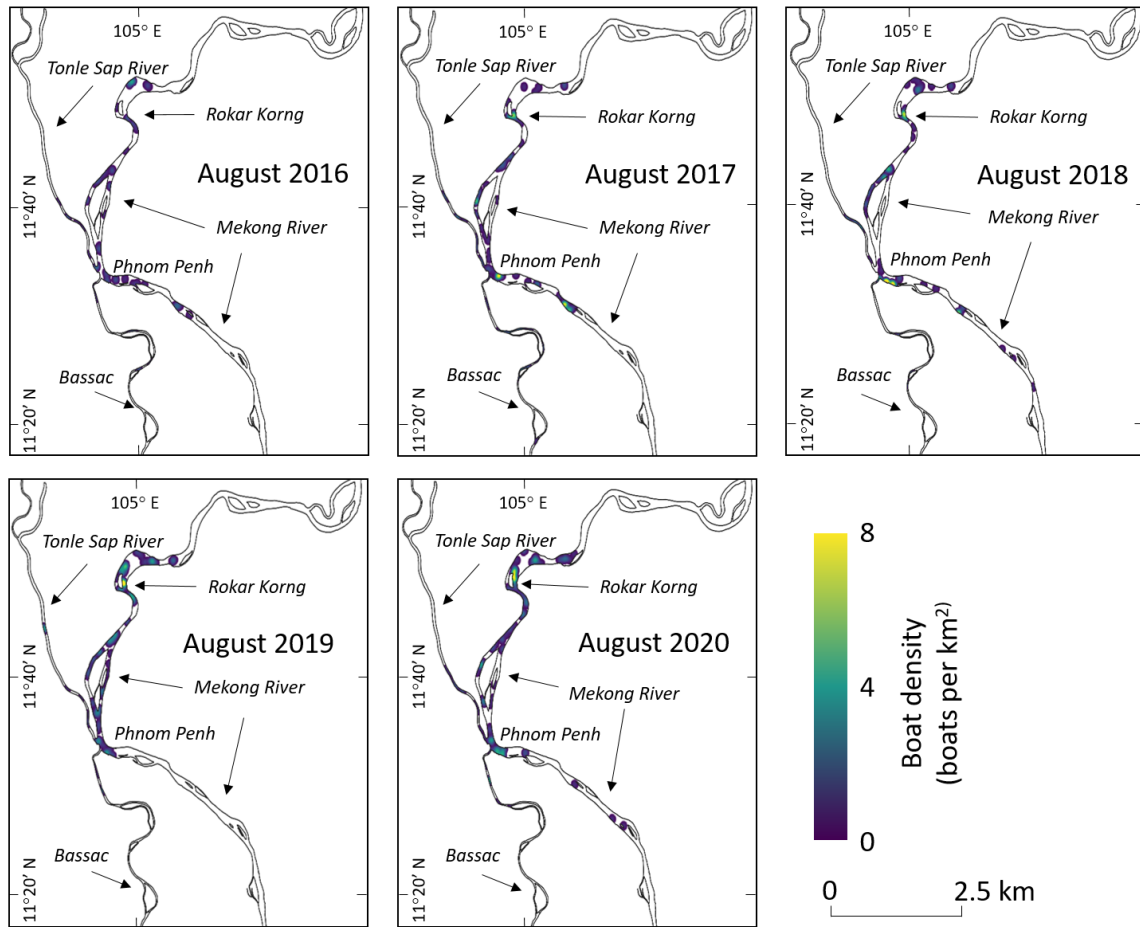

61

62 **SI Figure 8: Annual heat maps for August for the period 2016 - 2020 of the Mekong River around Phnom Penh**  
 63 **showing the locations of mining activity and the density of boats (boats per km<sup>2</sup>) showing changes in the spatial**  
 64 **distribution of mining activity over the five year period.**

65

66

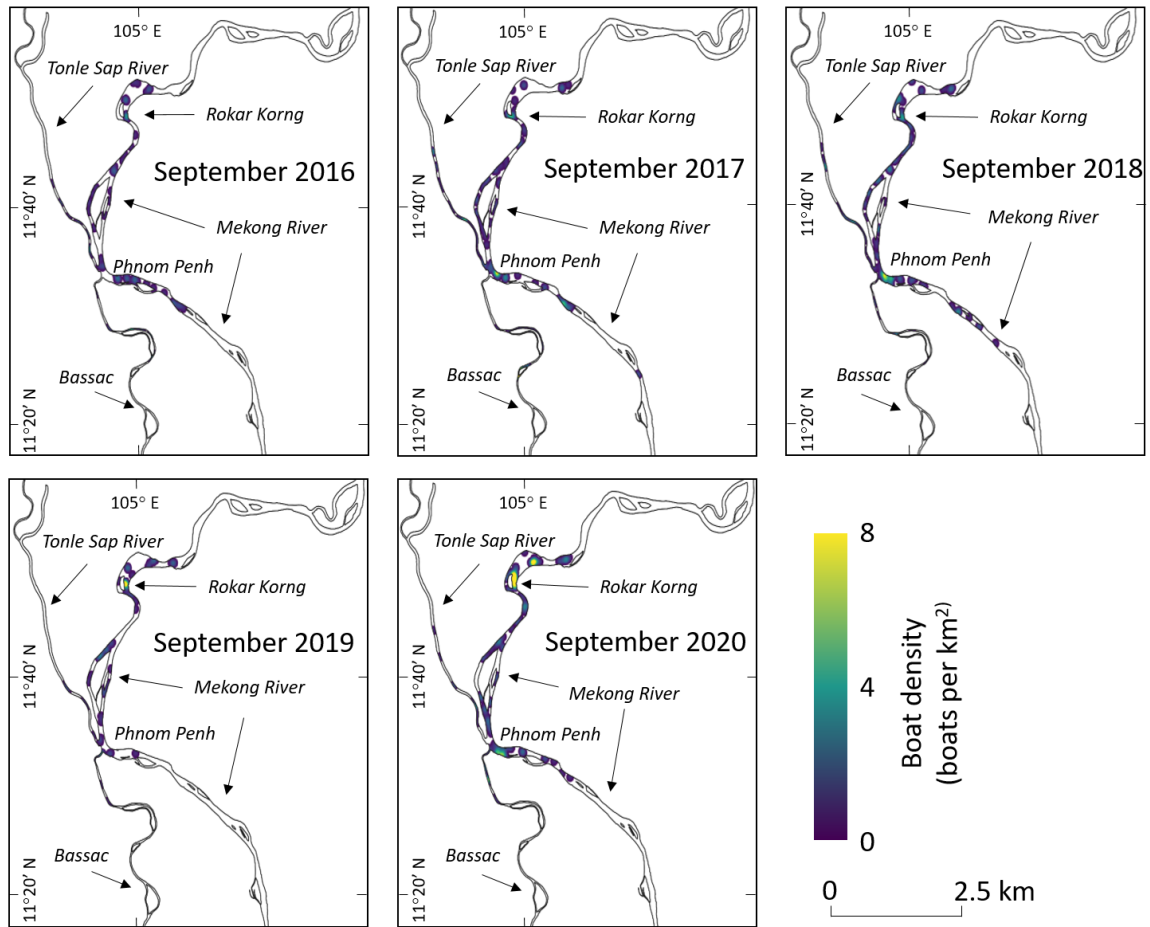

67

68 **SI Figure 9: Annual heat maps for September for the period 2016 - 2020 of the Mekong River around Phnom Penh**  
 69 **showing the locations of mining activity and the density of boats (boats per km<sup>2</sup>) showing changes in the spatial**  
 70 **distribution of mining activity over the five year period.**

71

72

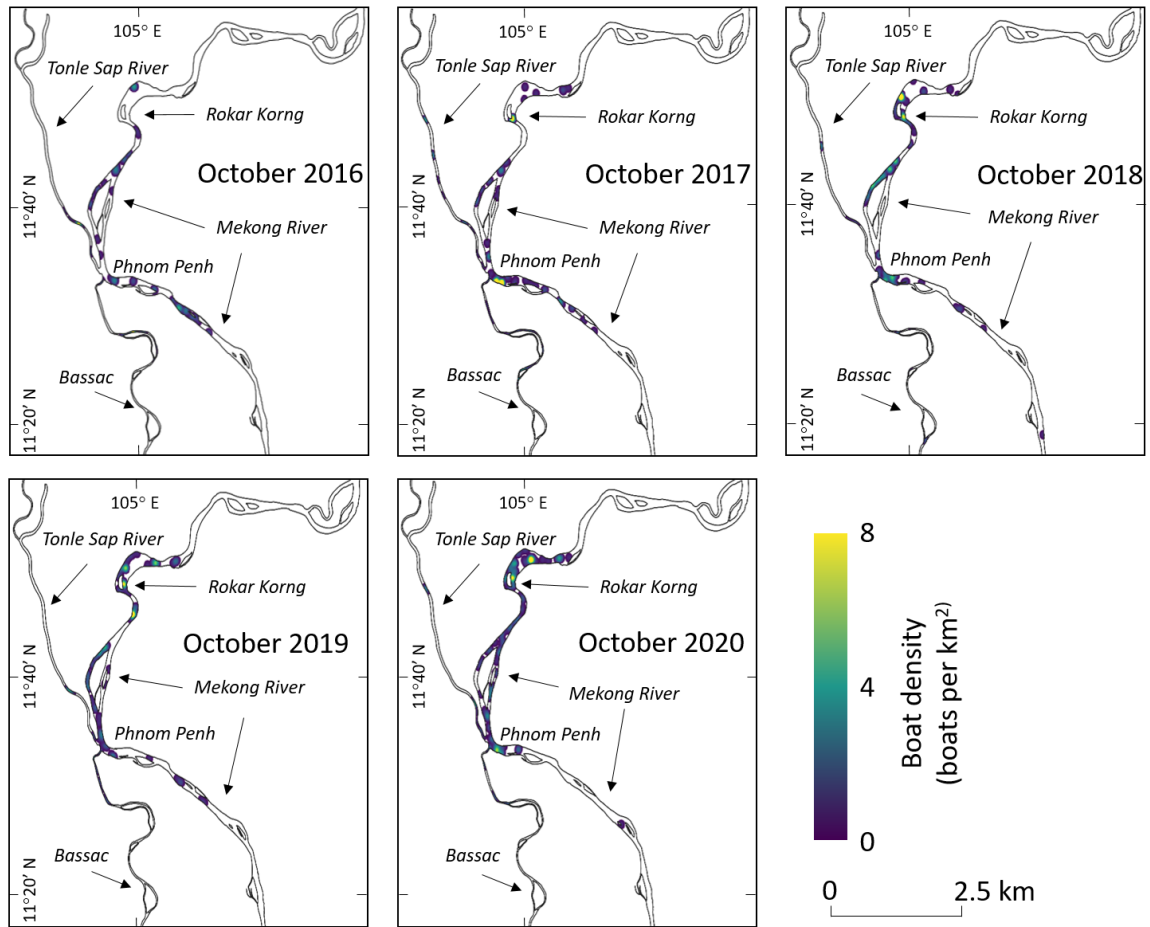

73

74 **SI Figure 10: Annual heat maps for October for the period 2016 - 2020 of the Mekong River around Phnom Penh**  
 75 **showing the locations of mining activity and the density of boats (boats per km<sup>2</sup>) showing changes in the spatial**  
 76 **distribution of mining activity over the five year period.**

77

78

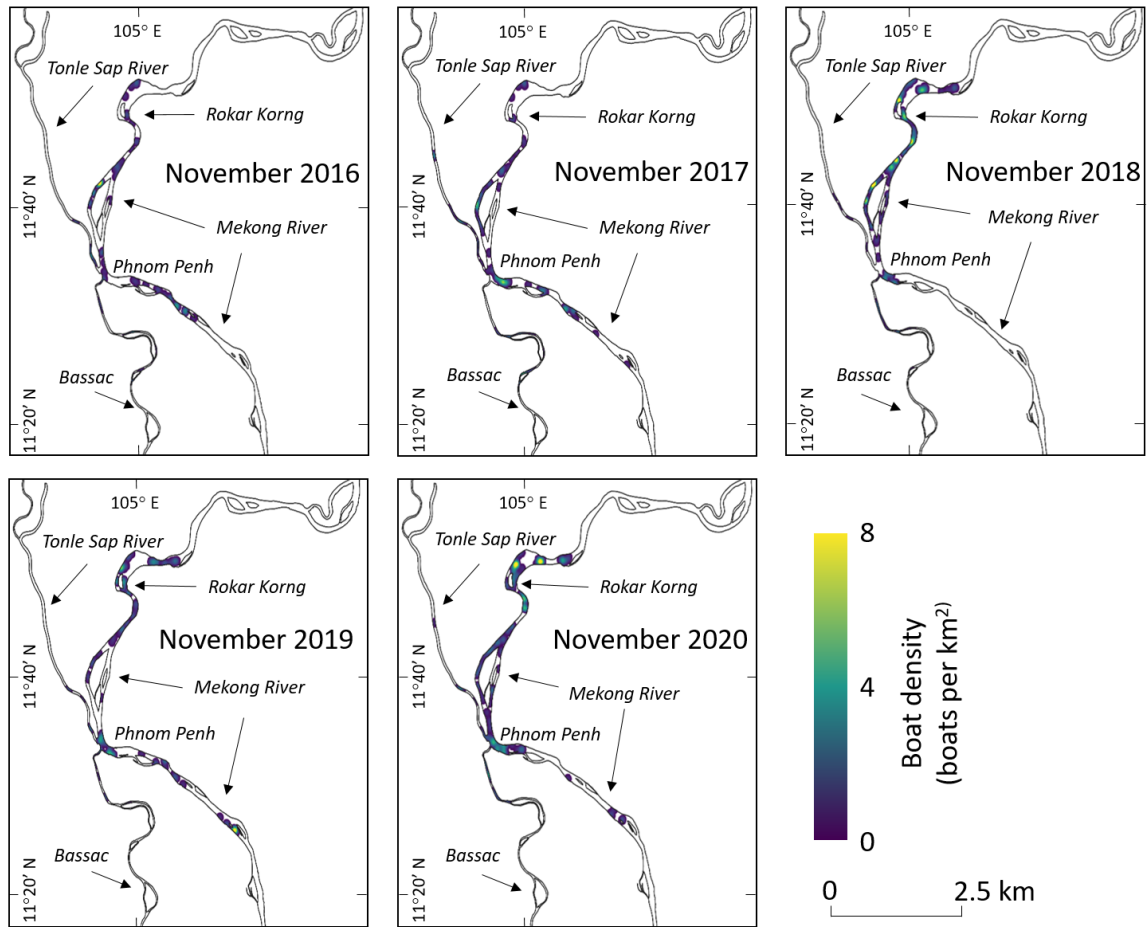

79

80 **SI Figure 11: Annual heat maps for November for the period 2016 - 2020 of the Mekong River around Phnom Penh**  
 81 **showing the locations of mining activity and the density of boats (boats per km<sup>2</sup>) showing changes in the spatial**  
 82 **distribution of mining activity over the five year period.**

83

84

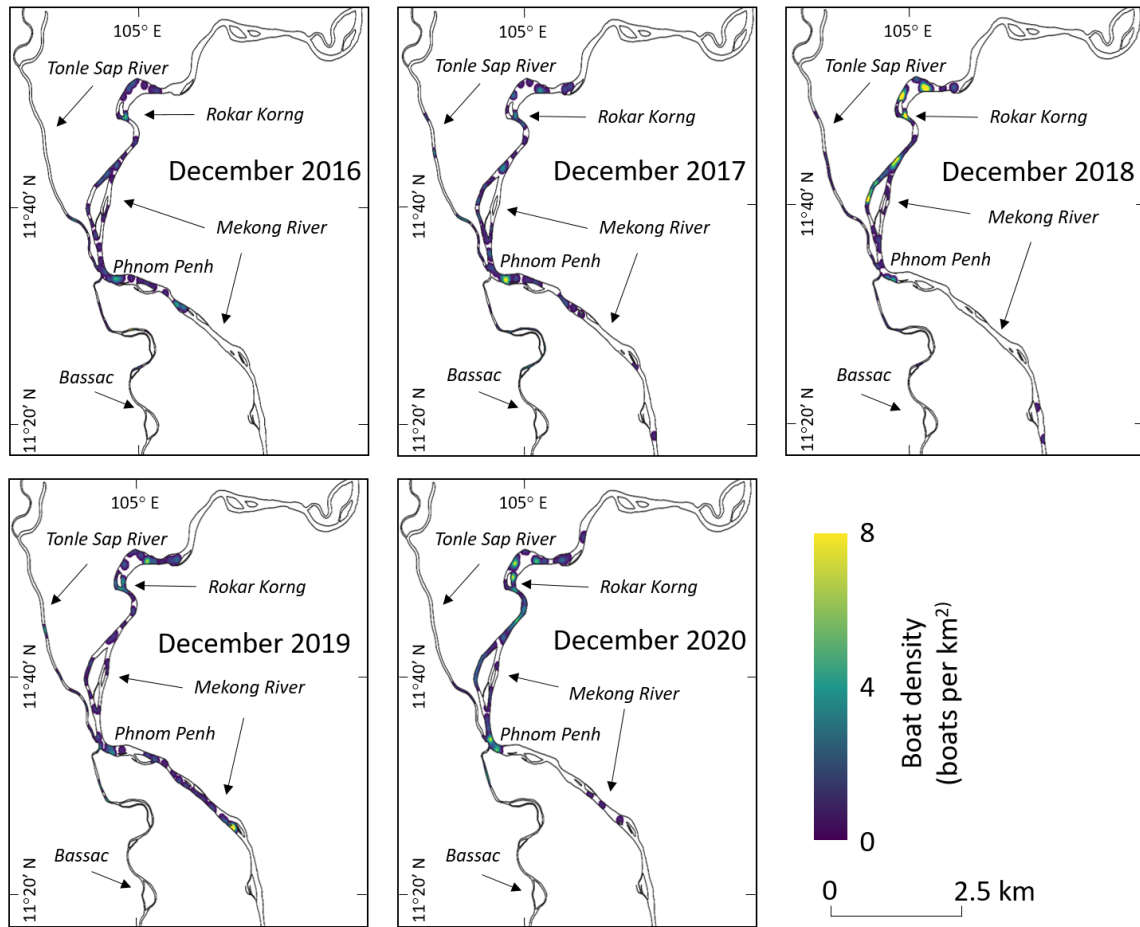

85

86 SI Figure 12: Annual heat maps for December for the period 2016 - 2020 of the Mekong River around Phnom Penh  
 87 showing the locations of mining activity and the density of boats (boats per km<sup>2</sup>) showing changes in the spatial  
 88 distribution of mining activity over the five year period.

89
